# Supplementary material for: Optimisation of laser parameters for the analysis of sulphur isotopes in sulphide minerals by laser ablation ICP-MS
Source: Royal Society of Chemistry journal article supplement (doi:10.1039/c4ja00011k), 2014-01-01
Supplement: c4ja00011k1.xlsx [file c4ja00011k1.xlsx]

## Sheet: Sheet1
Reduction of O2 interference on masses 32 and 34
Using 10% Xe in He gas in the collision cell (Agilent 7700 ICP-MS)
		background		proportion of O2 in background
	10% Xe gas	mass 32	mass 34	%32/(32+34)	%34/(32+34)	% of O2	32/34 ratio	Comment
	mL/min	cps *	cps
	0	491449	15990	96.8489	3.15112	27.0013	30.7348	contribution of O2 in background signal
	0.5	70098	3033	95.8526	4.14735	2.35781	23.1118	S background
	1	11109	500	95.693	4.307	-1.59142	22.218	S background
	1.5	1764	101	94.5845	5.41555	-29.0131	17.4653	low ratio due to high instrument mass bias^
			Theorietcal proportions
			32 O2	99.7999	0.20008		498.8
			32 S	95.7573	4.24267		22.5701
	* cps = counts per second
	^ a high flow of collision cell gas produces a strong mass dependant instrument bias, where mass 32 sensitivity is significantly reduced compared to mass 34
